# Supplementary material
Source: PubMed Central journal article supplement (PMC2886618)
Supplement: datasupp.pdf [file datasupp.pdf]

Kornyeyev D, Reyes M, Escobar AL

Luminal  $\text{Ca}^{2+}$  content regulates intracellular  $\text{Ca}^{2+}$  release in subepicardial myocytes of intact beating mouse hearts: Effect of exogenous buffers

### DATA SUPPLEMENT

#### METHODS

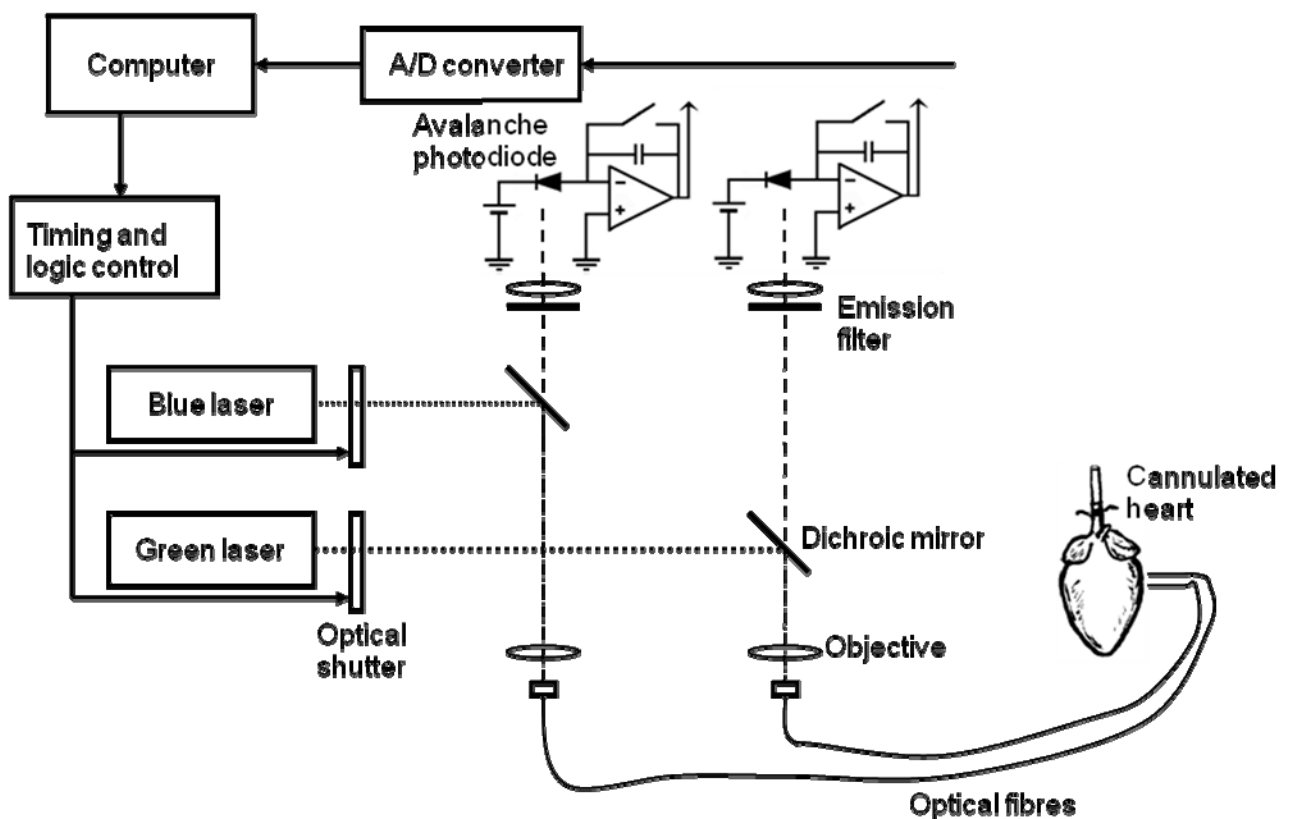

**Supplementary figure 1.** Scheme of the experimental setup for detecting whole heart fluorescent signals. A solid state blue laser (473 nm) was used to excite mag-fluo-4 and a solid state green laser (532 nm) was used to excite rhod-2, X-rhod-5F, and Di-8-ANEPPS. Both lasers were time-multiplexed by two ferroelectric modulators (optical shutters). The fluorescence

was detected with avalanche photodiodes that were connected to an integrating current-to-voltage converter controlled by a Digital Signal Processor (TI DSP 320, Texas Instruments, TX, USA).

## RESULTS

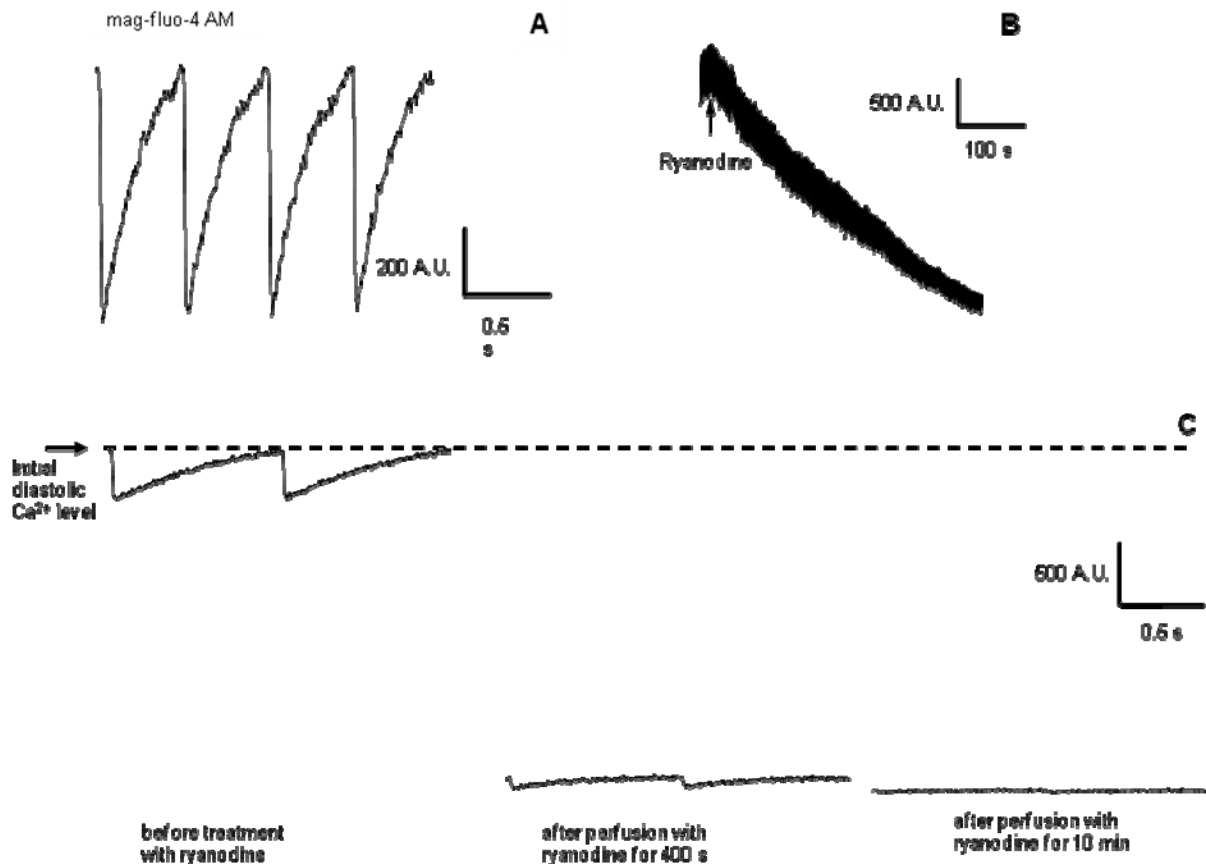

**Supplementary figure 2.** Changes in fluorescence from the SR lumen that were measured with the fluorescent dye mag-fluo-4 AM. Mouse hearts were loaded with the dye in the presence of 211  $\mu\text{M}$  EGTA AM. (A) A representative trace of luminal  $\text{Ca}^{2+}$  transients obtained at 21°C at a pacing frequency of 2 Hz. (B) Time course of the fluorescence during perfusion of a mouse

heart with Tyrode solution containing 25  $\mu\text{M}$  ryanodine. The vertical arrow indicates the beginning of the application of ryanodine. (C) Luminal  $\text{Ca}^{2+}$  transients recorded before ryanodine treatment (left trace), at 400 s (middle trace), and at 10 min (right trace) during the treatment. The horizontal arrow and the stroke line identify the diastolic level of SR  $\text{Ca}^{2+}$  prior to the perfusion with ryanodine. The experiments with ryanodine (B, C) were conducted at 21°C and at a pacing frequency of 1 Hz.

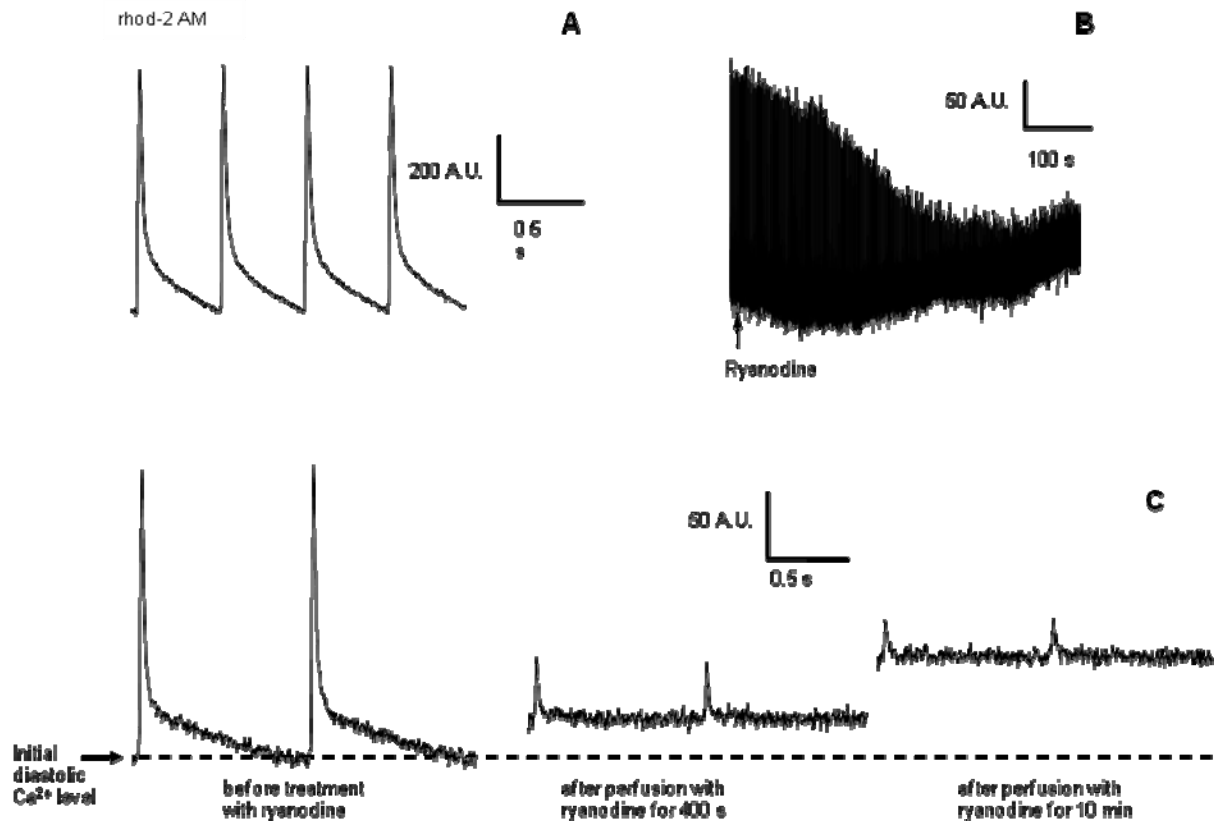

**Supplementary figure 3.** Changes in fluorescence from the cytosol measured with the fluorescent dye rhod-2 AM. Mouse hearts were loaded with the dye in the presence of 211  $\mu\text{M}$

EGTA AM. (A) A typical recording of cytosolic  $\text{Ca}^{2+}$  transients obtained at 21°C and a pacing frequency of 2 Hz. (B) Time course of fluorescence signal during perfusion of a mouse heart with Tyrode solution containing 25  $\mu\text{M}$  ryanodine. Ryanodine application is indicated by a vertical arrow. (C) Cytosolic  $\text{Ca}^{2+}$  transients recorded before ryanodine treatment (left trace), at 400 s (middle trace) and at 10 min (right trace) during the treatment. The horizontal arrow and the stroke line identify diastolic level of cytosolic  $[\text{Ca}^{2+}]$  prior to the perfusion with ryanodine. The experiments with ryanodine (B, C) were conducted at 21°C and at a pacing frequency of 1 Hz.

### **Mathematical model**

#### **$\text{Ca}^{2+}$ distribution in the myoplasm**

Changes in  $\text{Ca}^{2+}$  concentration in the myoplasm were evaluated by dividing the cytosolic space into four regions: a dyadic compartment where the release channels are present (Ryanodine Receptors (RyR) and L type Channels(L)); a region composed of  $l$  intermediate compartments where diffusion, binding to diffusional buffers and a  $\text{Ca}^{2+}$  pump were present;  $m$  central compartments where fixed buffers and a transport mechanism to the sarcoplasmic reticulum were also present; and  $n$  final compartments where just binding to diffusional buffers and diffusion were the sole mechanism for  $\text{Ca}^{2+}$  and cytosolic buffers translocation.

#### **a) $[\text{Ca}^{2+}]$ changes at the dyadic space (compartment 0):**

The absolute changes in  $\text{Ca}^{2+}$  concentration in this compartment were given by the difference between influx and efflux of  $\text{Ca}^{2+}$  as follows:

$$\frac{\partial [\text{Ca}^{2+}](t,0)}{\partial t} = J_{in}^{Ca}(t,0) - J_{out}^{Ca}(t,0)$$

where  $J_{in}^{Ca}(t,0)$  is the net  $Ca^{2+}$  influx and  $J_{out}^{Ca}(t,0)$  is the net  $Ca^{2+}$  efflux from compartment 0 at all times. The net  $Ca^{2+}$  influx was given by:

$$J_{in}^{Ca}(t,0) = J_{in}^{Ca}(t,0)_L + J_{in}^{Ca}(t,0)_{RyR} + J_{in}^{Ca}(t,0)_B + J_{in}^{Ca}(t,0)_D + J_{in}^{Ca}(t,0)_{Diff}$$

where  $J_{in}^{Ca}(t,0)_{RyR}$  represents  $Ca^{2+}$  influx from sarcoplasmic reticulum (SR) through Ryanodine receptor channels,  $J_{in}^{Ca}(t,0)_L$  represents  $Ca^{2+}$  influx from extracellular space through L type channels,  $J_{in}^{Ca}(t,0)_B$  is the  $Ca^{2+}$  released from mobile intracellular buffers located in compartment 0,  $J_{in}^{Ca}(t,0)_D$  is the  $Ca^{2+}$  unbound from the  $Ca^{2+}$  indicator at compartment 0 and  $J_{in}^{Ca}(t,0)_{Diff}$  is the  $Ca^{2+}$  influx from the cytosolic compartment 1 into compartment 0. These components were defined as follows:

$$J_{in}^{Ca}(t,0)_{RyR} = P_{RyR}(t) \cdot ([Ca^{2+}]_{SR}(t,0) - [Ca^{2+}](t,0))$$

$$J_{in}^{Ca}(t,0)_B = k_{offB} \cdot CaB(t,0)$$

$$J_{in}^{Ca}(t,0)_D = k_{offD} \cdot CaD(t,0)$$

$$J_{in}^{Ca}(t,0)_{Diff} = \frac{D_{Ca}}{dx^2} [Ca^{2+}](t,1)$$

$$J_{in}^{Ca}(t,0)_L = \frac{G_L(t) \cdot (V_m(t) - E_{ion}(t))}{2 \cdot F \cdot Vol}$$

$CaB(t,0)$  and  $CaD(t,0)$  are the concentration of  $Ca^{2+}$  bound to mobile buffers and the  $Ca^{2+}$  indicator located in compartment 0,  $k_{offB}$  and  $k_{offD}$  are the dissociation rate constant of  $Ca^{2+}$  from the mobile buffers and the  $Ca^{2+}$  indicator,  $D_{Ca}$  is the  $Ca^{2+}$  diffusion coefficient,  $dx$  is the thickness of compartment 0 and  $[Ca^{2+}](t,1)$  is the  $Ca^{2+}$  concentration in the first non-diadic compartment.  $P_{RyR}(t)$  is the  $Ca^{2+}$  permeability of the sarcoplasmic reticulum through Ryanodine receptors,  $[Ca^{2+}]_{SR}(t,0)$  is the local free  $Ca^{2+}$  concentration at the SR that is seen by the Ryanodine receptors and  $[Ca^{2+}](t,0)$  represents the cytosolic  $Ca^{2+}$  in the compartment 0 at all times.  $G_L(t)$  is the macroscopic  $Ca^{2+}$  conductance through L type channels,  $E_{ion}(t)$  is the

equilibrium potential for Ca,  $V_m(t)$  is the potential difference across the cellular membrane, which was changed from a resting potential  $V_{rest}$  to an excitation potential  $V_{ex}$  during a  $T_L$  amount of time in order to depolarized the plasma membrane.  $F$  is the Faraday constant and  $Vol$  is the volume of the compartment 0.

The RyR was modeled using a ten-state Markov Model with six closed states, one inhibited state and three open states. The model was defined by the following equations.

$$\begin{aligned} \frac{d[C1_{RyR}(t)]}{dt} &= -k_{C1C2} \cdot [Ca^{2+}](t,0) \cdot C1_{RyR}(t) + l_{C2C1} \cdot C2_{RyR}(t) \\ \frac{d[C2_{RyR}(t)]}{dt} &= k_{C1C2} \cdot [Ca^{2+}](t,0) \cdot C1_{RyR}(t) - (l_{C2C1} + k_{C2C3} \cdot [Ca^{2+}](t,0)) \cdot C2_{RyR}(t) + l_{C3C2} \cdot C3_{RyR}(t) \\ \frac{d[C3_{RyR}(t)]}{dt} &= k_{C2C3} \cdot [Ca^{2+}](t,0) \cdot C2_{RyR}(t) - (l_{C3C2} + k_{C3C4} \cdot [Ca^{2+}](t,0)) \cdot C3_{RyR}(t) + l_{C4C3} \cdot C4_{RyR}(t) \\ \frac{d[C4_{RyR}(t)]}{dt} &= k_{C3C4} \cdot [Ca^{2+}](t,0) \cdot C3_{RyR}(t) - (l_{C4C3} + k_{C4O1} \cdot [Ca^{2+}](t,0) + k_{C4O2}) \cdot C4_{RyR}(t) + \\ &+ l_{O1C4} \cdot O1_{RyR}(t) + l_{O2C4} \cdot O2_{RyR}(t) \\ \frac{d[I1_{RyR}(t)]}{dt} &= -l_{I1O1} \cdot I1_{RyR}(t) + k_{O1I1} \cdot [Ca^{2+}](t,0) \cdot O1_{RyR}(t) \\ \frac{d[C5_{RyR}(t)]}{dt} &= -(l_{C5C6} + k_{C5O2} + k_{C5O1}) \cdot C5_{RyR}(t) + k_{C6C5} \cdot C6_{RyR}(t) + l_{O1C5} \cdot O1_{RyR}(t) + l_{O2C5} \cdot O2_{RyR}(t) \\ \frac{d[C6_{RyR}(t)]}{dt} &= l_{C5C6} \cdot C5_{RyR}(t) - k_{C6C5} \cdot C6_{RyR}(t) \\ \frac{d[O1_{RyR}(t)]}{dt} &= k_{C4O1} \cdot [Ca^{2+}](t,0) \cdot C4_{RyR} + k_{C5O1} \cdot C5_{RyR}(t) + l_{O1I1} \cdot I1_{RyR}(t) - \\ &- (l_{O1C4} + l_{O1C5} + k_{O1I1} \cdot [Ca^{2+}](t,0) + k_{O1O3} \cdot A1_{Cseq}(t,0)) \cdot O1_{RyR}(t) + l_{O3O1} \cdot O3_{RyR}(t) \\ \frac{d[O2_{RyR}(t)]}{dt} &= k_{C4O2} \cdot C4_{RyR} + k_{C5O2} \cdot C5_{RyR}(t) - (l_{O2C4} + l_{O2C5}) \cdot O2_{RyR}(t) \\ \frac{d[O3_{RyR}(t)]}{dt} &= k_{O1O3} \cdot A1_{Cseq}(t,0) \cdot O1_{RyR}(t) - l_{O3O1} \cdot O3_{RyR}(t) \end{aligned}$$

Where  $O1_{RyR}$ ,  $O2_{RyR}$  and  $O3_{RyR}$  represent the three RyR's open states,  $C1_{RyR}$ ,  $C2_{RyR}$ , ...,  $C7_{RyR}$  represent the six RyR's closed states,  $I1_{RyR}$  represents the inhibited state and where  $k$  and  $l$  are the association and dissociation constants between different states.  $A1_{Cseq}(t,0)$  is the

interaction between the local Calsequestrin and the RyR and will be described later. The  $P_{RyR}(t)$  was

$$P_{RyR}(t) = Pe_{RyR} \cdot (O1_{RyR}(t) + O2_{RyR}(t) + O3_{RyR}(t))$$

where  $Pe_{RyR}$  was the permeability of the RyR.

The L type Channel was modeled using a Markov Model with three closed states, two inactive states and one open state. The L type channel was defined by the following equations.

$$\begin{aligned} S(t) &= \alpha_0 - (Vm(t) + 60) / K_\alpha \\ \alpha(t) &= S(t) / (\exp(S(t)) - 1) \\ \beta(t) &= \beta_0 \cdot \exp(-(Vm(t) + 60) / K_\beta) \\ \frac{d[C1_L(t)]}{dt} &= -3 \cdot \alpha(t) \cdot C1_L(t) + \beta(t) \cdot C2_L(t) \\ \frac{d[C2_L(t)]}{dt} &= 3 \cdot \alpha(t) \cdot C1_L(t) - (2 \cdot \alpha(t) + \beta(t)) \cdot C2_L(t) + 2 \cdot \beta(t) \cdot C3_L(t) \\ \frac{d[C3_L(t)]}{dt} &= 2 \cdot \alpha(t) \cdot C2_L(t) - (2 \cdot \beta(t) + \alpha(t)) \cdot C3_L(t) + 3 \cdot \beta(t) \cdot O1_L(t) \\ \frac{d[O1_L(t)]}{dt} &= \alpha(t) \cdot C3_L - (3 \cdot \beta(t) + \delta + k \cdot [Ca^{2+}](t,0)) \cdot O1_L(t) + \gamma \cdot Iv_L(t) + l \cdot ICA_L(t) \\ \frac{d[Iv_L(t)]}{dt} &= \delta \cdot O1_L(t) - \gamma \cdot Iv_L(t) \\ \frac{d[ICA_L(t)]}{dt} &= k \cdot [Ca^{2+}](t,0) \cdot O1_L(t) - l \cdot ICA_L(t) \end{aligned}$$

where  $C1_L$ ,  $C2_L$  and  $C3_L$  represent the three L type channel closed states,  $O1_L$  represents the open state,  $Iv_L$  represents the voltage inactivated state,  $ICA_L$  represents the  $Ca^{2+}$  inactivated state and where  $\alpha_0$ ,  $\beta_0$ ,  $\delta$ ,  $\gamma$ ,  $k$ , and  $l$  are the association and dissociation constants between different states; and  $K_\alpha$  and  $K_\beta$  are the voltage sensitivities of  $\alpha$  and  $\beta$ . The  $P_L(t)$  is

$$P_L(t) = Pe_L \cdot O1_L(t)$$

where  $Pe_L$  is the permeability of the L type channel.

The net  $\text{Ca}^{2+}$  efflux from compartment 0,  $J_{out}(t,0)$  is given by three components. The unbinding from mobile buffers and the indicator, and  $\text{Ca}^{2+}$  movement by diffusion:

$$J_{out}^{Ca}(t,0) = J_{out}^{Ca}(t,0)_B + J_{out}^{Ca}(t,0)_D + J_{out}^{Ca}(t,0)_{Diff}$$

$\text{Ca}^{2+}$  efflux from compartment 0 by  $\text{Ca}^{2+}$  binding to mobile buffers and the  $\text{Ca}^{2+}$  indicator is defined as:

$$J_{out}^{Ca}(t,0)_B = k_{onB} \cdot [\text{Ca}^{2+}](t,0) \cdot [B_{Tot}(t,0) - \text{CaB}(t,0)]$$

and

$$J_{out}^{Ca}(t,0)_D = k_{onD} \cdot [\text{Ca}^{2+}](t,0) \cdot [D_{Tot}(t,0) - \text{CaD}(t,0)]$$

where  $B_{Tot}(t,0)$  and  $D_{Tot}(t,0)$  are the total mobile buffer concentration and the total  $\text{Ca}^{2+}$  indicator in compartment 0;  $k_{onB}$  and  $k_{onD}$  are the association rate constants for the mobile buffer and the  $\text{Ca}^{2+}$  indicator. The  $\text{Ca}^{2+}$  diffusional efflux component is given by:

$$J_{out}^{Ca}(t,0)_{Diff} = \frac{D_{Ca}}{dx^2} \cdot [\text{Ca}^{2+}](t,0)$$

On the other hand, both the mobile buffers and the  $\text{Ca}^{2+}$  indicator are able to diffuse from and to the diadic space. This factor made the fraction of the mobile buffer bound to  $\text{Ca}^{2+}$  and the indicator bound to  $\text{Ca}^{2+}$  in this compartment change not only because of kinetics of this reaction but also because of diffusion. Formally,

$$\frac{\partial [\text{CaB}](t,0)}{\partial t} = J_{in}^{CaB}(t,0) - J_{out}^{CaB}(t,0)$$

and

$$\frac{\partial [\text{CaD}](t,0)}{\partial t} = J_{in}^{CaD}(t,0) - J_{out}^{CaD}(t,0)$$

where



$$J_{in}^{CaB}(t,0) = J_{in}^{CaB}(t,0)_B + J_{in}^{CaB}(t,0)_{Diff}$$

$$J_{out}^{CaB}(t,0) = J_{out}^{CaB}(t,0)_B + J_{out}^{CaB}(t,0)_{Diff}$$

and

$$J_{in}^{CaD}(t,0) = J_{in}^{CaD}(t,0)_D + J_{in}^{CaD}(t,0)_{Diff}$$

$$J_{out}^{CaD}(t,0) = J_{out}^{CaD}(t,0)_D + J_{out}^{CaD}(t,0)_{Diff}$$

Specifically,

$$J_{in}^{CaB}(t,0)_B = k_{onB} \cdot [B_{Tot}(t,0) - CaB(t,0)] = J_{out}^{Ca}(t,0)_B$$

$$J_{in}^{CaD}(t,0)_D = k_{onD} \cdot [D_{Tot}(t,0) - CaD(t,0)] = J_{out}^{Ca}(t,0)_D$$

$$J_{in}^{CaB}(t,0)_{Diff} = \frac{D_{CaB}}{dx^2} [CaB](t,1)$$

$$J_{in}^{CaD}(t,0)_{Diff} = \frac{D_{CaD}}{dx^2} [CaD](t,1)$$

and

$$J_{out}^{CaB}(t,0)_B = k_{offB} \cdot CaB(t,0) = J_{in}^{Ca}(t,0)_B$$

$$J_{out}^{CaD}(t,0)_D = k_{offD} \cdot CaD(t,0) = J_{in}^{Ca}(t,0)_D$$

$$J_{out}^{CaB}(t,0)_{Diff} = \frac{D_{CaB}}{dx^2} [CaB](t,0)$$

$$J_{out}^{CaD}(t,0)_{Diff} = \frac{D_{CaD}}{dx^2} [CaD](t,0)$$

In this case,  $D_{CaB}$  and  $D_{CaD}$  are the diffusion coefficients for the mobile buffers and the indicator bound to  $Ca^{2+}$ . Assuming that the free and bound form of the mobile buffers and the indicator can diffuse with the same speed, the total concentration of the mobile buffer and the indicator will be constant as function of time in these compartments.

$$B_{Tot}(t,0) = B_{free}(t,0) - CaB(t,0) = B_{Tot-initial}(0) = \text{constant}$$

$$D_{Tot}(t,0) = D_{free}(t,0) - CaD(t,0) = D_{Tot-initial}(0) = \text{constant}$$

**b) [ $Ca^{2+}$ ] changes in the intermediate compartments (1 to I+1):**

The change of  $Ca^{2+}$  concentration in any of these compartments was given by:

$$\frac{\partial [Ca^{2+}](t, j)}{\partial t} \Bigg|_{j=1}^{j=l+1} = J_{in}^{Ca}(t, j) - J_{out}^{Ca}(t, j)$$

Ca<sup>2+</sup> influx to these compartments was given by:

$$J_{in}^{Ca}(t, j) = J_{in}^{Ca}(t, j)_B + J_{in}^{Ca}(t, j)_D + J_{in}^{Ca}(t, j)_{Diff}$$

Particularly,

$$J_{in}^{Ca}(t, j)_B = k_{offB} \bullet CaB(t, j)$$

$$J_{in}^{Ca}(t, j)_D = k_{offD} \bullet CaD(t, j)$$

$$J_{in}^{Ca}(t, j)_{Diff} = \frac{D_{Ca}}{dx^2} [Ca^{2+}](t, j-1) + \frac{D_{Ca}}{dx^2} [Ca^{2+}](t, j+1)$$

Where  $[Ca^{2+}](t, j-1)$  and  $[Ca^{2+}](t, j+1)$  were the Ca<sup>2+</sup> concentrations in the compartments contiguous to compartment  $j$ . Efflux from each intermediate compartment was given by Ca<sup>2+</sup> binding, Ca<sup>2+</sup> diffusion and Ca<sup>2+</sup> extrusion to the extracellular compartment by a plasma membrane extrusion system (PMES):

$$J_{out}^{Ca}(t, j) = J_{out}^{Ca}(t, j)_B + J_{out}^{Ca}(t, j)_D + J_{out}^{Ca}(t, j)_{Diff} + J_{out}^{Ca}(t, j)_{PMES}$$

Specifically,

$$J_{out}^{Ca}(t, j)_B = k_{onB} \bullet [Ca^{2+}](t, j) \bullet [B_{Tot}(j) - CaB(t, j)]$$

$$J_{out}^{Ca}(t, j)_D = k_{onD} \bullet [Ca^{2+}](t, j) \bullet [D_{Tot}(j) - CaD(t, j)]$$

$$J_{out}^{Ca}(t, j)_{Diff} = 2 \bullet \frac{D_{Ca}}{dx^2} \bullet [Ca^{2+}](t, j)$$

$$J_{out}^{Ca}(t, j)_{PMES} = P_{PMES}(t, j) \bullet [Ca^{2+}](t, j)$$

$P_{CPump}(t, j)$  was the rate at which the pump extrudes Ca<sup>2+</sup> to the extracellular space. The PMES (Na/Ca Exchanger) was modeled using a Markov Model with two closed states and one open state. The PMES was defined by the following equations.

$$\begin{aligned}\frac{d[C1_{PMES}(t)]}{dt} &= -2 \cdot k_{PMES} \cdot [Ca^{2+}](t, j) \cdot C1_{PMES}(t) + l_{PMES} \cdot C2_{PMES}(t) \\ \frac{d[C2_{PMES}(t)]}{dt} &= 2 \cdot k_{PMES} \cdot [Ca^{2+}](t, j) \cdot C1_{PMES}(t) - (l_{PMES} + k_{PMES} \cdot [Ca^{2+}](t, j)) \cdot C2_{PMES}(t) + \\ &+ 2 \cdot l_{PMES} \cdot O1_{PMES}(t) \\ \frac{d[O1_{PMES}(t)]}{dt} &= k_{PMES} \cdot [Ca^{2+}](t, j) \cdot C2_{PMES}(t) - 2 \cdot l_{PMES} \cdot O1_{PMES}(t)\end{aligned}$$

Where  $C1_{PMES}$  and  $C2_{PMES}$  represent the two closed states of the PMES,  $O1_{PMES}$  represents the open state, and where  $k_{PMES}$  and  $l_{PMES}$  were the association and dissociation constants between the different states. The  $P_{PMES}(t)$  was

$$P_{PMES}(t) = R_{PMES} \cdot N_{PMES} \cdot O1_{PMES}(t)$$

where  $R_{PMES}$  represents the maximum rate of the PMES and  $N_{PMES}$  is the number of PMES in each compartment.

Analogous to what was shown for the first compartment, the indicator and the mobile buffers can react and diffuse.

$$\begin{aligned}\frac{\partial [CaB](t, j)}{\partial t} &= \{k_{onB} \cdot [B_{Tot}(t, j) - CaB(t, j)] - k_{offB} \cdot CaB(t, j)\} + \\ &\frac{D_{CaB}}{dx^2} \{CaB(t, j-1) - 2 \cdot CaB(t, j) + CaB(t, j+1)\} \\ &\text{and} \\ \frac{\partial [CaD](t, 0)}{\partial t} &= \{k_{onD} \cdot [D_{Tot}(t, j) - CaD(t, j)] - k_{offD} \cdot CaD(t, j)\} + \\ &\frac{D_{CaD}}{dx^2} \{CaD(t, j-1) - 2 \cdot CaD(t, j) + CaD(t, j+1)\}\end{aligned}$$

Showing a conservation condition

$$\begin{aligned}B_{Tot}(t, j) &= B_{Tot-initial}(j) = \text{constant} \\ D_{Tot}(t, j) &= D_{Tot-initial}(j) = \text{constant}\end{aligned}$$

**c)  $[Ca^{2+}]$  changes in the central compartments (compartment  $l+1$  to  $l+n+1$ ):**

Once more, the change in  $Ca^{2+}$  concentration in the compartments from  $l+1$  to  $n$  was computed as the difference between  $Ca^{2+}$  influx and  $Ca^{2+}$  efflux as follows:

$$\left. \frac{\partial [Ca^{2+}](t, j)}{\partial t} \right|_{l+1}^{l+n+1} = J_{in}^{Ca}(t, j) - J_{out}^{Ca}(t, j)$$

$Ca^{2+}$  influx into these compartments comprises four terms:

$$J_{in}^{Ca}(t, j) = J_{in}^{Ca}(t, j)_B + J_{in}^{Ca}(t, j)_D + J_{in}^{Ca}(t, j)_T + J_{in}^{Ca}(t, j)_{Diff}$$

The expressions for calculating  $J_{in}^{Ca}(t, j)_B$ ,  $J_{in}^{Ca}(t, j)_D$  and  $J_{in}^{Ca}(t, j)_{Diff}$  were identical to the ones described in section b. Additionally,  $J_{in}^{Ca}(t, j)_T$  is the  $Ca^{2+}$  released from the  $Ca^{2+}$  binding protein Troponin, represented as a immobile buffer located in the central compartments.

$$J_{in}^{Ca}(t, j)_T = k_{offT} \bullet CaT(t, j)$$

On the other hand,  $Ca^{2+}$  efflux from the central compartments involved five components due to  $Ca^{2+}$  extrusion by the sarcoplasmic reticulum  $Ca^{2+}$  pump, buffer binding, and  $Ca^{2+}$  diffusion to neighboring compartments:

$$J_{out}^{Ca}(t, j) = J_{out}^{Ca}(t, j)_B + J_{out}^{Ca}(t, j)_D + J_{out}^{Ca}(t, j)_T + J_{out}^{Ca}(t, j)_{Diff} + J_{out}^{Ca}(t, j)_{SERCA}$$

In particular,

$$J_{out}^{Ca}(t, j)_{SERCA} = P_{SERCA}(t, j) \bullet [Ca^{2+}](t, j) \bullet \frac{1}{1 + \left( \frac{[Ca^{2+}]_{SR}(t, j)}{kd_{SR}} \right)^2}$$

In this expression,  $J_{out}^{Ca}(t, j)_{SERCA}$  is the magnitude of the  $Ca^{2+}$  efflux produced by the sarcoplasmic reticulum  $Ca^{2+}$  pump. The flux is proportional to the concentration of myoplasmic  $Ca^{2+}$  and is inactivated by the luminal  $Ca^{2+}$  concentration.  $P_{SERCA}(t, j)$  is the rate at which the pump extrudes  $Ca^{2+}$  to the SR. The Pump was modeled using a Markov model with two closed states and one open state. The Pump was defined by the following equations.

$$\begin{aligned} \frac{d[C1_{SERCA}(t)]}{dt} &= -2 \cdot k_{SERCA} \cdot [Ca^{2+}](t, j) \cdot C1_{SERCA}(t) + l_{SERCA} \cdot C2_{SERCA}(t) \\ \frac{d[C2_{SERCA}(t)]}{dt} &= 2 \cdot k_{SERCA} \cdot [Ca^{2+}](t, j) \cdot C1_{SERCA}(t) - (l_{SERCA} + k_{SERCA} \cdot [Ca^{2+}](t, j)) \cdot C2_{SERCA}(t) + \\ &+ 2 \cdot l_{SERCA} \cdot O1_{SERCA}(t) \\ \frac{d[O1_{SERCA}(t)]}{dt} &= k_{SERCA} \cdot [Ca^{2+}](t, j) \cdot C2_{SERCA}(t) - 2 \cdot l_{SERCA} \cdot O1_{SERCA}(t) \end{aligned}$$

where  $C1_{SERCA}$  and  $C2_{SERCA}$  represent the two closed states of the pump,  $O1_{SERCA}$  represents the open state, and where  $k_{SERCA}$  and  $l_{SERCA}$  were the association and dissociation constants between the different states. The  $P_{SERCA}(t)$  was

$$P_{CPump}(t) = R_{SERCA} \cdot N_{SERCA} \cdot O1_{SERCA}(t)$$

where  $R_{SERCA}$  represents the maximum rate of the pump and  $N_{SERCA}$  is the number of pumps in each compartment.

Finally, in the central compartments  $Ca^{2+}$  can decrease by binding to Troponin.

$$J_{out}^{Ca}(t, j)_T = k_{onT} \cdot [Ca^{2+}](t, j) \cdot [T_{Tot}(j) - CaT(t, j)]$$

Similarly to what happen in the intermediate compartments the mobile buffers and the indicator were able to diffuse between the compartments in its free and bound forms.

#### **d) $[Ca^{2+}]$ changes in the final compartments (from $l+m+1$ to $l+m+n+1$ ):**

The  $Ca^{2+}$  dynamics, mobile buffers, and the indicator were the same as described for the intermediate compartments (b). In the last compartment a reflection condition was set in to order integrate the model and the model was assumed to be symmetric with respect to the release sites.

## Ca<sup>2+</sup> distribution in the Sarcoplasmic reticulum .

In this model the sarcoplasmic reticulum consists of  $l+m+n+1$  diffusionally connected compartments. All the compartments have the fix Ca<sup>2+</sup> binding protein calsequestrin (Q). The general expression for calculating the free Ca<sup>2+</sup> concentrations is given by:

$$\begin{aligned} \left. \frac{\partial [Ca^{2+}]_{SR}(t, j)}{\partial t} \right|_0^{l+m+n+1} &= J_{in}^{Ca}(t, j)_{SR} - J_{out}^{Ca}(t, j)_{SR} \\ &= \{J_{in}^{Ca}(t, j)_Q - J_{out}^{Ca}(t, j)_Q\} \\ &+ \{J_{in}^{Ca}(t, j)_{diff}^{SR} - J_{out}^{Ca}(t, j)_{diff}^{SR}\} + J_{in}^{Ca}(t, j)_{SERCA}^{SR} - J_{out}^{Ca}(t, 0)_{RyR}^{SR} \end{aligned}$$

and

$$J_{out}^{Ca}(t, 0)_{RyR}^{SR} = P_{RyR}(t) \cdot \{[Ca^{2+}]_{SR}(t, 0) - [Ca^{2+}](t, 0)\} \cdot vol_{myo/SR}$$

$$J_{in}^{Ca}(t, j)_{diff}^{SR} - J_{out}^{Ca}(t, j)_{diff}^{SR} = \frac{D_{Ca}}{dx^2} \cdot \{[Ca^{2+}]_{SR}(t, j-1) - 2 \cdot [Ca^{2+}]_{SR}(t, j) + [Ca^{2+}]_{SR}(t, j+1)\}$$

$$J_{in}^{Ca}(t, j)_{Pump}^{SR} = P_{SERCA}(t, j) \cdot [Ca^{2+}](t, j) \cdot \frac{1}{1 + \left( \frac{[Ca^{2+}]_{SR}(t, j)}{kd_{SR}} \right)^2} \cdot vol_{myo/SR}$$

In these expressions,  $vol_{myo/SR}$  is the ratio between the myoplasmic volume and the sarcoplasmic reticulum volume. The sarcoplasmic reticulum Ca<sup>2+</sup> efflux through ryanodine receptors,  $J_{out}^{Ca}(t, 0)_{RyR}^{SR}$  is only present at the first compartment and the uptake to the SR,

$J_{in}^{Ca}(t, 0)_{SERCA}^{SR}$  was located on the central compartments (from  $l$  to  $l+m$ ).

Calsequestrin was modeled with a binding reaction scheme in which only the fully bound protein can undergo a transition to the active state. The model was a Markov model with 34 states (32 binding sites and 1 active state) and was able to interact with the RyR. The equations that represent the model are the following:

$$\frac{d[C1_{Cseq}(t, j)]}{dt} = -k \cdot [Ca^{2+}]_{SR}(t, j) \cdot C1_{Cseq}(t, j) + l \cdot C2_{Cseq}(t, j)$$

$$\frac{d[C33_{Cseq}(t, j)]}{dt} = k \cdot [Ca^{2+}]_{SR}(t, j) \cdot C32_{Cseq}(t, j) - (l + k^*) \cdot C33_{Cseq}(t, j) + l^* \cdot O1_{Cseq}(t, j)$$

$$\frac{d[O1_{Cseq}(t, j)]}{dt} = k^* \cdot C33_{Cseq}(t, j) - l^* \cdot O1_{Cseq}(t, j)$$

and for  $i=2$  to  $32$

$$\frac{d[Ci_{Cseq}(t, j)]}{dt} = k \cdot [Ca^{2+}]_{SR}(t, j) \cdot C[i-1]_{Cseq}(t, j) - (l + k \cdot [Ca^{2+}]_{SR}(t, j)) \cdot Ci_{Cseq}(t, j) + l \cdot C[i+1]_{Cseq}(t, j)$$

The concentration of calsequestrin and calcium bound to calsequestrin (CaQ) were given by:

$$CaQ(t, j) = \left[ \frac{\left( \sum_{i=1}^{32} (i-1) \cdot Ci_{Cseq}(t, j) + 32 \cdot (C33_{Cseq}(t, j) + O1_{Cseq}(t, j)) \right)}{32} \right] \cdot Q_{total}$$

$$Q(t, j) = Q_{total} - CaQ(t, j)$$

where  $Q_{total}$  is the total calsequestrin concentration.

The equations were numerically integrated using a finite difference approximation (Euler method). The initial values for the state variables were calculated using the inversion of the Q-matrix procedure (Colquhoun and Hawks, 1981). The code was written in G language, LabView 8.2 (National Instruments, Austin, TX, USA).

#### e) Addition of exogenous EGTA:

Total exogenous EGTA was added homogenously in all the cytosolic compartments at a given time. The  $Ca^{2+}$  dynamics, binding and diffusion of EGTA was calculated as follows. The net  $Ca^{2+}$  efflux from compartment 0,  $J_{out}(t,0)$  was given by two components. Namely, the unbinding of EGTA and  $Ca^{2+}$  and the movement by diffusion:

$$J_{out}^{Ca}(t,0) = J_{out}^{Ca}(t,0)_B + J_{out}^{Ca}(t,0)_D + J_{out}^{Ca}(t,0)_{EGTA} + J_{out}^{Ca}(t,0)_{Diff}$$

The  $Ca^{2+}$  efflux from compartment 0 by  $Ca^{2+}$  binding to mobile buffers and the  $Ca^{2+}$  indicator was defined as:

$$J_{out}^{Ca}(t,0)_B = k_{onB} \cdot [Ca^{2+}](t,0) \cdot [B_{Tot}(t,0) - CaB(t,0)]$$

$$J_{out}^{Ca}(t,0)_D = k_{onD} \cdot [Ca^{2+}](t,0) \cdot [D_{Tot}(t,0) - CaD(t,0)]$$

and

$$J_{out}^{Ca}(t,0)_{EGTA} = k_{onEGTA} \cdot [Ca^{2+}](t,0) \cdot [EGTA_{Tot}(t,0) - CaEGTA(t,0)]$$

where  $B_{Tot}(t,0)$ ,  $D_{Tot}(t,0)$  and  $EGTA_{Tot}(t,0)$  were the total mobile buffer concentrations and the total  $Ca^{2+}$  indicator in compartment 0;  $k_{onB}$ ,  $k_{onD}$  and  $k_{onEGTA}$  were the association rate constants for the mobile buffer, the  $Ca^{2+}$  indicator and EGTA. The  $Ca^{2+}$  diffusional efflux component was given by:

$$J_{out}^{Ca}(t,0)_{Diff} = \frac{D_{Ca}}{dx^2} \cdot [Ca^{2+}](t,0)$$

Both the mobile buffers and the  $Ca^{2+}$  indicator were able to diffuse from and to the diadic space. As mentioned above, this factor made the fraction of mobile buffer bound to  $Ca^{2+}$ , EGTA, and the indicator bound to  $Ca^{2+}$  in this compartment change not only because of kinetics of this reaction but also because of diffusion.

$$\frac{\partial [CaB](t,0)}{\partial t} = J_{in}^{CaB}(t,0) - J_{out}^{CaB}(t,0)$$

$$\frac{\partial [CaD](t,0)}{\partial t} = J_{in}^{CaD}(t,0) - J_{out}^{CaD}(t,0)$$

and

$$\frac{\partial [CaEGTA](t,0)}{\partial t} = J_{in}^{CaEGTA}(t,0) - J_{out}^{CaEGTA}(t,0)$$

where



$$\begin{aligned}
J_{in}^{CaB}(t,0) &= J_{in}^{CaB}(t,0)_B + J_{in}^{CaB}(t,0)_{Diff} \\
J_{int}^{CaD}(t,0) &= J_{in}^{CaD}(t,0)_D + J_{in}^{CaD}(t,0)_{Diff} \\
J_{in}^{CaEGTA}(t,0) &= J_{in}^{CaEGTA}(t,0)_{EGTA} + J_{in}^{CaEGAT}(t,0)_{Diff}
\end{aligned}$$

and

$$\begin{aligned}
J_{out}^{CaB}(t,0) &= J_{out}^{CaB}(t,0)_B + J_{out}^{CaB}(t,0)_{Diff} \\
J_{out}^{CaD}(t,0) &= J_{out}^{CaD}(t,0)_D + J_{out}^{CaD}(t,0)_{Diff} \\
J_{out}^{CaEGTA}(t,0) &= J_{out}^{CaEGTA}(t,0)_{EGTA} + J_{out}^{CaEGAT}(t,0)_{Diff}
\end{aligned}$$

Specifically,

$$\begin{aligned}
J_{in}^{CaB}(t,0)_B &= k_{onB} \cdot [B_{Tot}(t,0) - CaB(t,0)] = J_{out}^{Ca}(t,0)_B \\
J_{in}^{CaD}(t,0)_D &= k_{onD} \cdot [D_{Tot}(t,0) - CaD(t,0)] = J_{out}^{Ca}(t,0)_D \\
J_{in}^{CaEGTA}(t,0)_D &= k_{onEGTA} \cdot [EGTA_{Tot}(t,0) - CaEGTA(t,0)] = J_{out}^{Ca}(t,0)_{EGTA} \\
J_{in}^{CaB}(t,0)_{Diff} &= \frac{D_{CaB}}{dx^2} [CaB](t,1) \\
J_{in}^{CaD}(t,0)_{Diff} &= \frac{D_{CaD}}{dx^2} [CaD](t,1) \\
J_{in}^{CaEGTA}(t,0)_{Diff} &= \frac{D_{CaEGTA}}{dx^2} [CaEGTA](t,1)
\end{aligned}$$

and

$$\begin{aligned}
J_{out}^{CaB}(t,0)_B &= k_{offB} \cdot CaB(t,0) = J_{in}^{Ca}(t,0)_B \\
J_{out}^{CaD}(t,0)_D &= k_{offD} \cdot CaD(t,0) = J_{in}^{Ca}(t,0)_D \\
J_{out}^{CaEGTA}(t,0)_{EGTA} &= k_{offEGTA} \cdot CaEGTA(t,0) = J_{in}^{Ca}(t,0)_{EGTA}
\end{aligned}$$

In this case,  $D_{CaEGTA}$  is the diffusion coefficient for the mobile EGTA bound to  $Ca^{2+}$ . Assuming that the free and bound form of the mobile EGTA can diffuse with the same speed, the total concentration of the mobile buffer will be constant as function of time in these compartments.

$$EGTA_{Tot}(t,0) = EGTA_{free}(t,0) - CaEGTA(t,0) = EGTA_{Tot-initial}(0) = \text{constant}$$

Finally, this approach for the addition of EGTA was not only used for the first compartment but also for all of the cytosolic compartments as well.

**Supplemental table 1 - General Parameters**

| Parameter         | Description                                        | Value   | Unit                |
|-------------------|----------------------------------------------------|---------|---------------------|
| $[Ca^{2+}]_i$     | Resting myoplasmic $[Ca^{2+}]$                     | 0.08    | $\mu M$             |
| $D_{Ca\ Cy}$      | $Ca^{2+}$ diffusion coefficient (Cytosol)          | 0.25    | $\mu m^2/ms$        |
| $D_{Ca\ SR}$      | $Ca^{2+}$ diffusion coefficient (SR)               | 0.08    | $\mu m^2/ms$        |
| $D_{Tot}$         | Total indicator concentration                      | 80      | $\mu M$             |
| $k_{onD}$         | Indicator association rate constant                | 0.13    | $\mu M^{-1}ms^{-1}$ |
| $k_{offD}$        | Indicator dissociation rate constant               | 0.069   | $ms^{-1}$           |
| $D_{CaD}$         | $Ca^{2+}$ -Indicator diffusion coefficient         | 0.05    | $\mu m^2/ms$        |
| $B_{Tot}$         | Total cytosolic Buffer concentration               | 600     | $\mu M$             |
| $k_{onB}$         | Cytosolic Buffer association rate constant         | 0.002   | $\mu M^{-1}ms^{-1}$ |
| $k_{offB}$        | Cytosolic Buffer dissociation rate constant        | 0.002   | $ms^{-1}$           |
| $D_{CaB}$         | $Ca^{2+}$ - Cytosolic Buffer diffusion coefficient | 0.02    | $\mu m^2/ms$        |
| $T_{Tot}$         | Total Troponin concentration                       | 40      | $\mu M$             |
| $k_{onT}$         | Troponin association rate constant                 | 0.005   | $\mu M^{-1}ms^{-1}$ |
| $k_{offT}$        | Troponin dissociation rate constant                | 0.005   | $ms^{-1}$           |
| $[Ca^{2+}]_{SR}$  | Resting sarcoplasmic reticulum $[Ca^{2+}]$         | 1000    | $\mu M$             |
| $EGTA_{Tot}$      | Total cytosolic EGTA concentration                 | 400     | $\mu M$             |
| $k_{onEGTA}$      | Cytosolic EGTA association rate constant           | 0.005   | $\mu M^{-1}ms^{-1}$ |
| $k_{offEGTA}$     | Cytosolic EGTA dissociation rate constant          | 0.00025 | $ms^{-1}$           |
| $D_{CaEGTA}$      | $Ca^{2+}$ - Cytosolic EGTA diffusion coefficient   | 0.1     | $\mu m^2/ms$        |
| $Q_{Tot}$         | Total Calsequestrine concentration                 | 1000    | $\mu M$             |
| $dx$              | Compartment length                                 | 0.2     | $\mu M$             |
| $vol_{myo/SR}$    | Myoplasm/SR volume ratio                           | 200     |                     |
| $n$               | Total number of compartments                       | 10      |                     |
| $l$               | Number of compartments in intermediate region      | 2       |                     |
| $m$               | Number of compartments in central region           | 6       |                     |
| $n$               | Number of compartments in final region             | 2       |                     |
| $\delta t$        | Integration time step                              | 0.004   | ms                  |
| $N_{PMES}$        | # of P. Membrane Extrusion Systems per compartment | 10      |                     |
| $R_{PMES}$        | P. Membrane Extrusion Systems transfer rate        | 20      | $ms^{-1}$           |
| $R_{SERCA}$       | SERCA transfer rate                                | 12      | $ms^{-1}$           |
| $Pe_{RyR}$        | Permeability of the RyR                            | 20      | $ms^{-1}$           |
| $Pe_L$            | Permeability of the L type Channel                 | 5       | $ms^{-1}$           |
| $[Ca^{2+}]_{Ext}$ | Extra cellular $[Ca^{2+}]$                         | 1000    | $\mu M$             |
| $V_{rest}$        | Resting membrane Potential                         | - 90    | mV                  |
| $V_E$             | Excitation Potential                               | 110     | mV                  |
| $T_L$             | Excitation Time                                    | 1       | Ms                  |

**Supplemental table 2 - RyR Model's Parameters Table**

| Parameter  | Value  | Unit                             |
|------------|--------|----------------------------------|
| $k_{C1C2}$ | 0.05   | $\mu\text{M}^{-1}\text{ms}^{-1}$ |
| $l_{C2C1}$ | 0.002  | $\text{ms}^{-1}$                 |
| $k_{C2C3}$ | 0.17   | $\mu\text{M}^{-1}\text{ms}^{-1}$ |
| $l_{C3C2}$ | 1.42   | $\text{ms}^{-1}$                 |
| $k_{C3C4}$ | 0.17   | $\mu\text{M}^{-1}\text{ms}^{-1}$ |
| $l_{C4C3}$ | 4.44   | $\text{ms}^{-1}$                 |
| $k_{C4O1}$ | 0.17   | $\mu\text{M}^{-1}\text{ms}^{-1}$ |
| $l_{O1C4}$ | 25     | $\text{ms}^{-1}$                 |
| $k_{O1I1}$ | 1e-5   | $\mu\text{M}^{-1}\text{ms}^{-1}$ |
| $l_{I1O1}$ | 0.001  | $\text{ms}^{-1}$                 |
| $k_{O1O3}$ | 0.02   | $\mu\text{M}^{-1}\text{ms}^{-1}$ |
| $l_{O3O1}$ | 0.1    | $\text{ms}^{-1}$                 |
| $k_{C5O1}$ | 0.01   | $\mu\text{M}^{-1}\text{ms}^{-1}$ |
| $l_{O1C5}$ | 0.0025 | $\text{ms}^{-1}$                 |
| $k_{C6C5}$ | 0.02   | $\text{ms}^{-1}$                 |
| $l_{C5C6}$ | 0.5    | $\text{ms}^{-1}$                 |
| $k_{C5O2}$ | 1      | $\text{ms}^{-1}$                 |
| $k_{O2C5}$ | 2      | $\text{ms}^{-1}$                 |
| $k_{C4O2}$ | 0.001  | $\text{ms}^{-1}$                 |
| $l_{O2C4}$ | 0.001  | $\text{ms}^{-1}$                 |

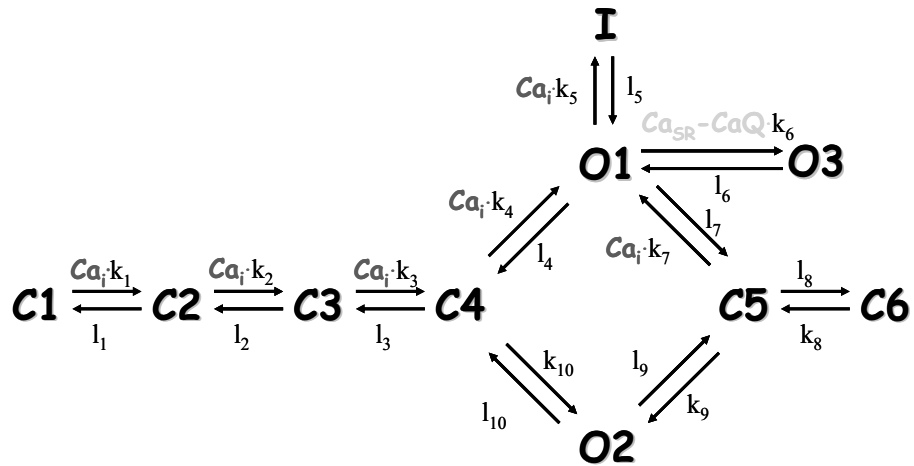

**Supplementary figure 4.** Markovian scheme of modal RyR2 channel gating.

**Supplemental table 3 - PMES (Na/Ca Exchanger) Model's Parameters Table**

| Parameter | Value | Unit                             |
|-----------|-------|----------------------------------|
| <i>k</i>  | 0.01  | $\mu\text{M}^{-1}\text{ms}^{-1}$ |
| <i>I</i>  | 0.01  | $\text{ms}^{-1}$                 |

**Supplemental table 4 - SERCA Pump Model's Parameters Table**

| Parameter | Value | Unit                             |
|-----------|-------|----------------------------------|
| <i>k</i>  | 0.01  | $\mu\text{M}^{-1}\text{ms}^{-1}$ |
| <i>I</i>  | 0.01  | $\text{ms}^{-1}$                 |

**Supplemental table 5 - Calsequestrin Parameters Table**

| Parameter  | Value | Unit                             |
|------------|-------|----------------------------------|
| <i>k</i>   | 100   | $\mu\text{M}^{-1}\text{ms}^{-1}$ |
| <i>I</i>   | 8.5   | $\text{ms}^{-1}$                 |
| <i>k</i> * | 100   | $\text{ms}^{-1}$                 |
| <i>I</i> * | 1     | $\text{ms}^{-1}$                 |
